# Supplementary material for: Machine Learning Models Combined with Virtual Screening and Molecular Docking to Predict Human Topoisomerase I Inhibitors
Source: PubMed Central journal article supplement (PMC6601036; doi:10.3390/molecules24112107), 2019-06-04
Supplement: molecules-24-02107-s001.pdf [file molecules-24-02107-s001.pdf]

# Supporting Information

## for

# Machine Learning Models Combined with Virtual Screening and Molecular Docking to Predict Human Topoisomerase I Inhibitors

Bingke Li<sup>1,2</sup>, Xiaokang Kang<sup>1</sup>, Dan Zhao<sup>1</sup>, Yurong Zou<sup>1</sup>, Xudong Huang<sup>1</sup>, Jiexue Wang<sup>1,\*</sup>, Chenghua Zhang<sup>3,\*</sup>

<sup>1</sup> Institute of Functional Molecules, College of Chemistry and Life Science, Chengdu Normal University, Chengdu 611130, China; KXK2799956460@163.com (X.K.); audreyzhaodan@163.com (D.Z.); zyrlia1018@163.com (Y.Z.); hxd1997116@163.com (X.H.)

<sup>2</sup> School of Biological and Chemical Engineering, Nanyang Institute of Technology, Nanyang 473004; libingke86@126.com (B.L.)

<sup>3</sup> School of Basic Medical Sciences, North Sichuan Medical College, Nanchong 637000

\* Corresponding authors. E-mail addresses: xueer0702@163.com (J.W.); zchua@nsmc.edu.cn (C.Z.)

## Table of Contents

|           | Caption                                                                                                                                                                                                               | Page |
|-----------|-----------------------------------------------------------------------------------------------------------------------------------------------------------------------------------------------------------------------|------|
| Table S1  | The effect of the different values of Ntree ( $100 \leq Ntree \leq 3000$ ) on the final OOB PERs of RF within the training set and the testing set for the subject of Top1.                                           | 1    |
| Table S2  | Relatively important 63 descriptors identified by the optimal RF model for the prediction of Top1is and non-Top1is.                                                                                                   | 5    |
| Table S3  | Relatively important 63 descriptors identified by SVM for the prediction of Top1is and non-Top1is.                                                                                                                    | 7    |
| Table S4  | Relatively important 37 descriptors identified by C4.5 DT for the prediction of Top1is and non-Top1is.                                                                                                                | 9    |
| Table S5  | 67 molecules with RF scores greater than 0.7.                                                                                                                                                                         | 11   |
| Table S6  | All molecular descriptors used in this work.                                                                                                                                                                          | 13   |
| Figure S1 | The three actual non-Top1is mispredicted as Top1is.                                                                                                                                                                   | 20   |
| Figure S2 | The three actual Top1is mispredicted as non-Top1is (three out of eleven).                                                                                                                                             | 20   |
| Figure S3 | The visualized distributions of compounds. (A) in the external validation set (55 compounds), (B) in the date set of molecules singled out by virtual screening with RF scores greater than 0.7 (67 compounds).       | 21   |
| Figure S4 | The molecular weight distributions of compounds. (A) in the external validation set (55 compounds), (B) in the date set of molecules singled out by virtual screening with RF scores greater than 0.7 (67 compounds). | 22   |

---

**Table S1.** The effect of the different values of  $N_{tree}$  ( $100 \leq N_{tree} \leq 3000$ ) on the final OOB PERs of RF within the training set and the testing set for the subject of Top1.

| Value of $N_{tree}$<br>(the initial step-size is equal to <b>100</b> ) | Final OOB PER %<br>(within the training set) | Final OOB PER %<br>(within the testing set) |
|------------------------------------------------------------------------|----------------------------------------------|---------------------------------------------|
| 100                                                                    | 9.26879501                                   | 3.29218102                                  |
| <b>200</b>                                                             | <b>8.44490242</b>                            | <b>2.88065839</b>                           |
| 300                                                                    | 9.06282234                                   | 3.08641982                                  |
| 400                                                                    | 8.65087509                                   | 3.08641982                                  |
| <b>500</b>                                                             | <b>8.95983505</b>                            | <b>2.88065839</b>                           |
| <b>600</b>                                                             | <b>8.95983505</b>                            | <b>2.88065839</b>                           |
| 700                                                                    | 8.95983505                                   | 3.08641982                                  |
| 800                                                                    | 9.06282234                                   | 3.08641982                                  |
| 900                                                                    | 8.75386238                                   | 3.29218102                                  |
| 1000                                                                   | 8.65087509                                   | 3.29218102                                  |
| 1100                                                                   | 8.54788876                                   | 3.08641982                                  |
| 1200                                                                   | 8.65087509                                   | 3.08641982                                  |
| 1300                                                                   | 8.44490242                                   | 3.08641982                                  |
| 1400                                                                   | 8.34191608                                   | 3.08641982                                  |
| 1500                                                                   | 8.23892879                                   | 3.08641982                                  |
| <b>1600</b>                                                            | <b>8.44490242</b>                            | <b>2.88065839</b>                           |
| 1700                                                                   | 8.54788876                                   | 3.08641982                                  |
| 1800                                                                   | 8.65087509                                   | 3.08641982                                  |
| 1900                                                                   | 8.75386238                                   | 3.08641982                                  |
| 2000                                                                   | 8.54788876                                   | 3.08641982                                  |
| 2100                                                                   | 8.54788876                                   | 3.08641982                                  |
| 2200                                                                   | 8.75386238                                   | 3.08641982                                  |
| 2300                                                                   | 8.54788876                                   | 3.08641982                                  |
| 2400                                                                   | 8.54788876                                   | 3.08641982                                  |
| 2500                                                                   | 8.54788876                                   | 3.08641982                                  |
| 2600                                                                   | 8.44490242                                   | 3.08641982                                  |
| 2700                                                                   | 8.54788876                                   | 3.08641982                                  |
| 2800                                                                   | 8.44490242                                   | 3.08641982                                  |
| 2900                                                                   | 8.44490242                                   | 3.08641982                                  |
| 3000                                                                   | 8.54788876                                   | 3.08641982                                  |
| Value of $N_{tree}$<br>(the initial step-size is equal to <b>10</b> )  | Final OOB PER %<br>(within the training set) | Final OOB PER %<br>(within the testing set) |
| 100                                                                    | 9.26879501                                   | 3.29218102                                  |
| 110                                                                    | 8.75386238                                   | 3.29218102                                  |
| 120                                                                    | 8.34191608                                   | 3.29218102                                  |
| 130                                                                    | 8.23892879                                   | 3.08641982                                  |

|            |                   |                   |
|------------|-------------------|-------------------|
| 140        | 8.75386238        | 3.29218102        |
| 150        | 8.54788876        | 3.29218102        |
| 160        | 8.85684872        | 3.29218102        |
| 170        | 8.54788876        | 3.08641982        |
| <b>180</b> | <b>8.34191608</b> | <b>2.88065839</b> |
| <b>190</b> | <b>8.44490242</b> | <b>2.88065839</b> |
| <b>200</b> | <b>8.44490242</b> | <b>2.88065839</b> |
| <b>210</b> | <b>8.44490242</b> | <b>2.88065839</b> |
| <b>220</b> | <b>8.75386238</b> | <b>2.88065839</b> |
| <b>230</b> | <b>9.16580868</b> | <b>2.88065839</b> |
| 240        | 8.85684872        | 3.08641982        |
| 250        | 8.95983505        | 3.08641982        |
| 260        | 8.95983505        | 3.08641982        |
| 270        | 8.95983505        | 3.08641982        |
| 280        | 9.06282234        | 3.08641982        |
| 290        | 8.95983505        | 3.08641982        |
| 300        | 9.06282234        | 3.08641982        |
| 310        | 8.75386238        | 3.49794245        |
| 320        | 8.95983505        | 3.29218102        |
| 330        | 9.06282234        | 3.49794245        |
| 340        | 8.95983505        | 3.49794245        |
| 350        | 8.75386238        | 3.49794245        |
| 360        | 9.16580868        | 3.29218102        |
| 370        | 8.85684872        | 3.29218102        |
| 380        | 8.95983505        | 3.49794245        |
| 390        | 8.54788876        | 3.29218102        |
| 400        | 8.65087509        | 3.08641982        |
| 410        | 8.44490242        | 3.29218102        |
| 420        | 8.54788876        | 3.29218102        |
| 430        | 8.65087509        | 3.08641982        |
| 440        | 8.75386238        | 3.08641982        |
| 450        | 8.75386238        | 3.08641982        |
| 460        | 8.85684872        | 3.29218102        |
| 470        | 8.75386238        | 3.29218102        |
| <b>480</b> | <b>8.95983505</b> | <b>2.88065839</b> |
| <b>490</b> | <b>8.85684872</b> | <b>2.88065839</b> |
| <b>500</b> | <b>8.95983505</b> | <b>2.88065839</b> |
| <b>510</b> | <b>9.06282234</b> | <b>2.88065839</b> |
| <b>520</b> | <b>9.06282234</b> | <b>2.88065839</b> |
| <b>530</b> | <b>9.06282234</b> | <b>2.88065839</b> |
| <b>540</b> | <b>9.16580868</b> | <b>2.88065839</b> |

|                                                              |                                              |                                             |
|--------------------------------------------------------------|----------------------------------------------|---------------------------------------------|
| <b>550</b>                                                   | <b>9.26879501</b>                            | <b>2.88065839</b>                           |
| <b>560</b>                                                   | <b>9.16580868</b>                            | <b>2.88065839</b>                           |
| 570                                                          | 9.16580868                                   | 3.08641982                                  |
| 580                                                          | 9.06282234                                   | 3.08641982                                  |
| 590                                                          | 9.06282234                                   | 3.08641982                                  |
| <b>600</b>                                                   | <b>8.95983505</b>                            | <b>2.88065839</b>                           |
| 610                                                          | 8.85684872                                   | 3.08641982                                  |
| 620                                                          | 8.95983505                                   | 3.08641982                                  |
| 630                                                          | 8.85684872                                   | 3.08641982                                  |
| 640                                                          | 8.95983505                                   | 3.08641982                                  |
| 650                                                          | 8.85684872                                   | 3.08641982                                  |
| 660                                                          | 8.75386238                                   | 3.08641982                                  |
| 670                                                          | 9.06282234                                   | 3.08641982                                  |
| 680                                                          | 8.95983505                                   | 3.08641982                                  |
| 690                                                          | 8.85684872                                   | 3.08641982                                  |
| 700                                                          | 8.95983505                                   | 3.08641982                                  |
| 1500                                                         | 8.23892879                                   | 3.08641982                                  |
| 1510                                                         | 8.23892879                                   | 3.08641982                                  |
| 1520                                                         | 8.23892879                                   | 3.08641982                                  |
| 1530                                                         | 8.23892879                                   | 3.08641982                                  |
| 1540                                                         | 8.34191608                                   | 3.08641982                                  |
| 1550                                                         | 8.34191608                                   | 3.08641982                                  |
| 1560                                                         | 8.34191608                                   | 3.08641982                                  |
| 1570                                                         | 8.44490242                                   | 3.08641982                                  |
| <b>1580</b>                                                  | <b>8.34191608</b>                            | <b>2.88065839</b>                           |
| <b>1590</b>                                                  | <b>8.44490242</b>                            | <b>2.88065839</b>                           |
| <b>1600</b>                                                  | <b>8.44490242</b>                            | <b>2.88065839</b>                           |
| <b>1610</b>                                                  | <b>8.54788876</b>                            | <b>2.88065839</b>                           |
| 1620                                                         | 8.65087509                                   | 3.08641982                                  |
| 1630                                                         | 8.54788876                                   | 3.08641982                                  |
| 1640                                                         | 8.54788876                                   | 3.08641982                                  |
| 1650                                                         | 8.65087509                                   | 3.08641982                                  |
| 1660                                                         | 8.44490242                                   | 3.08641982                                  |
| 1670                                                         | 8.54788876                                   | 3.08641982                                  |
| 1680                                                         | 8.65087509                                   | 3.08641982                                  |
| 1690                                                         | 8.65087509                                   | 3.08641982                                  |
| 1700                                                         | 8.54788876                                   | 3.08641982                                  |
| Value of $N_{tree}$<br>(the initial step-size is equal to 1) | Final OOB PER %<br>(within the training set) | Final OOB PER %<br>(within the testing set) |
| 170                                                          | 8.54788876                                   | 3.08641982                                  |
| 171                                                          | 8.54788876                                   | 3.08641982                                  |

|            |                   |                   |
|------------|-------------------|-------------------|
| 172        | 8.44490242        | 3.08641982        |
| 173        | 8.54788876        | 3.08641982        |
| 174        | 8.54788876        | 3.08641982        |
| 175        | 8.44490242        | 2.88065839        |
| 176        | 8.54788876        | 2.88065839        |
| 177        | 8.54788876        | 2.88065839        |
| 178        | 8.44490242        | 2.88065839        |
| 179        | 8.34191608        | 2.88065839        |
| 180        | 8.34191608        | 2.88065839        |
| <b>181</b> | <b>8.23892879</b> | <b>2.88065839</b> |
| <b>182</b> | <b>8.23892879</b> | <b>2.88065839</b> |
| <b>183</b> | <b>8.23892879</b> | <b>2.88065839</b> |
| <b>184</b> | <b>8.23892879</b> | <b>2.88065839</b> |
| 185        | 8.54788876        | 2.88065839        |
| 186        | 8.54788876        | 2.88065839        |
| 187        | 8.54788876        | 2.88065839        |
| 188        | 8.65087509        | 2.88065839        |
| 189        | 8.54788876        | 2.88065839        |
| 190        | 8.44490242        | 2.88065839        |
| 1570       | 8.44490242        | 3.08641982        |
| 1571       | 8.44490242        | 3.08641982        |
| 1572       | 8.34191608        | 3.08641982        |
| 1573       | 8.44490242        | 3.08641982        |
| 1574       | 8.44490242        | 3.08641982        |
| 1575       | 8.34191608        | 3.08641982        |
| 1576       | 8.34191608        | 2.88065839        |
| 1577       | 8.34191608        | 2.88065839        |
| 1578       | 8.34191608        | 2.88065839        |
| 1579       | 8.34191608        | 2.88065839        |
| 1580       | 8.34191608        | 2.88065839        |
| 1581       | 8.34191608        | 2.88065839        |
| 1582       | 8.34191608        | 2.88065839        |
| 1583       | 8.44490242        | 2.88065839        |
| 1584       | 8.44490242        | 2.88065839        |
| 1585       | 8.44490242        | 2.88065839        |
| 1586       | 8.44490242        | 2.88065839        |
| 1587       | 8.44490242        | 2.88065839        |
| 1588       | 8.44490242        | 2.88065839        |
| 1589       | 8.44490242        | 2.88065839        |
| 1590       | 8.44490242        | 2.88065839        |

**Table S2.** Relatively important 63 descriptors identified by the optimal RF model for the prediction of Toplis and non-Toplis.

| Descriptor          | Ranking | Description                                                                         |
|---------------------|---------|-------------------------------------------------------------------------------------|
| Rugty               | 1       | Molecular rugosity                                                                  |
| Tcent               | 2       | Centric Index                                                                       |
| S(27)               | 3       | Atom-type Estate sum for :C::                                                       |
| S(38)               | 4       | Atom-type Estate sum for :N:-                                                       |
| ${}^6\chi_{CH}^V$   | 5       | Valence molecular connectivity Chi indices for cycles of 6 atoms                    |
| Nring               | 6       | Numbers of rings                                                                    |
| Hiwpl               | 7       | Hydrophilic Intery Moment                                                           |
| S(22)               | 8       | Atom-type Estate sum for >CH-                                                       |
| ${}^4\chi_{PC}$     | 9       | Simple molecular connectivity Chi indices for path/cluster                          |
| ${}^6\chi_{CH}$     | 10      | Simple molecular connectivity Chi indices for cycles of 6 atom                      |
| S(35)               | 11      | Atom-type Estate sum for :N:                                                        |
| ${}^3\kappa_\alpha$ | 12      | Kappa alpha indices for three boned fragments                                       |
| $Q_{O, Max}$        | 13      | Most positive charge on O atoms                                                     |
| Nrot                | 14      | Number of rotatable bonds                                                           |
| $Q_{N, Min}$        | 15      | Most negative charge on N atoms                                                     |
| Tiwie               | 16      | Information Weiner                                                                  |
| S(26)               | 17      | Atom-type Estate sum for :C:-                                                       |
| $Q_{N, SS}$         | 18      | Sum of squares of charges on N atoms                                                |
| ${}^3\chi_P$        | 19      | Simple molecular connectivity Chi indices for path order 3                          |
| ${}^3\kappa$        | 20      | Molecular shape Kappa indices for three boned fragments                             |
| S(21)               | 21      | Atom-type Estate sum for :CH: (aromatic)                                            |
| ${}^5\chi_{CH}^V$   | 22      | Valence molecular connectivity Chi indices for cycles of 5 atoms                    |
| Hiwpb               | 23      | Hydrophobic Intery Moment                                                           |
| $A_{Q, max}$        | 24      | Most positive charge in a molecule                                                  |
| S(41)               | 25      | Atom-type Estate sum for -O-                                                        |
| $Q_{C, Max}$        | 26      | Most positive charge on C atoms                                                     |
| S(10)               | 27      | Atom-type H Estate sum for :CH: ( $sp^2$ , aromatic)                                |
| S(9)                | 28      | Atom-type H Estate sum for =CH- ( $sp^2$ )                                          |
| phi                 | 29      | Kier molecular flexibility index                                                    |
| dis1                | 30      | Length vectors (longest distance)                                                   |
| S(25)               | 31      | Atom-type Estate sum for =C<                                                        |
| S(34)               | 32      | Atom-type Estate sum for =N-                                                        |
| $Q_{C, Min}$        | 33      | Most negative charge on C atoms                                                     |
| Rpc                 | 34      | Relative positive charge                                                            |
| $Q_{O, SS}$         | 35      | Sum of squares of charges on O atoms                                                |
| Sapcw               | 36      | Sum of charge weighted solvent accessible surface areas of positively charged atoms |

|                                   |    |                                                                                |
|-----------------------------------|----|--------------------------------------------------------------------------------|
| $Q_{O, \text{Min}}$               | 37 | Most negative charge on O atoms                                                |
| Tbala                             | 38 | Balaban Index                                                                  |
| S(40)                             | 39 | Atom-type Estate sum for =O                                                    |
| Mac                               | 40 | Mean absolute charge                                                           |
| $A_{Q, \text{min}}$               | 41 | Most negative charge in a molecule                                             |
| Shpb                              | 42 | Hydrophobic region                                                             |
| $Q_{N, \text{Max}}$               | 43 | Most positive charge on N atoms                                                |
| S(13)                             | 44 | Atom-type H Estate sum for $\text{CH}_n$ (unsaturated)                         |
| Nnitro                            | 45 | Count of N atoms                                                               |
| $Q_{H, \text{Min}}$               | 46 | Most negative charge on H atoms                                                |
| Svpc                              | 47 | Sum of van der Waals surface areas of positively charged atoms                 |
| Tradi                             | 48 | PetitJohn R2 Index                                                             |
| ${}^5\chi_{\text{CH}}$            | 49 | Simple molecular connectivity Chi indices for cycles of 5 atom                 |
| $Q_{C, \text{SS}}$                | 50 | Sum of squares of charges on C atoms                                           |
| dis2                              | 51 | Length vectors (longest third atom)                                            |
| Gloty                             | 52 | Molecular globularity                                                          |
| PSA                               | 53 | Polar molecular surface area                                                   |
| Svpcw                             | 54 | Sum of charge weighted van der Waals surface areas of positively charged atoms |
| ${}^2\kappa$                      | 55 | Molecular shape Kappa indices for two boned fragments                          |
| ${}^4\chi_{\text{PC}}^{\text{v}}$ | 56 | Valence molecular connectivity Chi indices for path/cluster                    |
| Svnc                              | 57 | Sum of van der Waals surface areas of negatively charged atoms                 |
| ${}^3\chi_{\text{P}}^{\text{v}}$  | 58 | Valence molecular connectivity Chi indices for path order 3                    |
| dis3                              | 59 | Length vectors (4 <sup>th</sup> atom)                                          |
| S(1)                              | 60 | Atom-type H Estate sum for -OH                                                 |
| Capty                             | 61 | Capacity factor                                                                |
| $Q_{H, \text{SS}}$                | 62 | Sum of squares of charges on H atoms                                           |
| Hiwpa                             | 63 | Amphiphilic Moment                                                             |



**Table S3.** Relatively important 63 descriptors identified by SVM for the prediction of Toplis and non-Toplis.

| Descriptor      | Ranking | Description                                                      |
|-----------------|---------|------------------------------------------------------------------|
| ${}^5\chi_{CH}$ | 1       | Simple molecular connectivity Chi indices for cycles of 5 atom   |
| Rugty           | 2       | Molecular rugosity                                               |
| Tcent           | 3       | Centric Index                                                    |
| S(10)           | 4       | Atom-type H Estate sum for :CH: ( $sp^2$ , aromatic)             |
| $Q_{N, Min}$    | 5       | Most negative charge on N atoms                                  |
| S(25)           | 6       | Atom-type Estate sum for =C<                                     |
| $Q_{C, Max}$    | 7       | Most positive charge on C atoms                                  |
| ${}^6\chi_{CH}$ | 8       | Valence molecular connectivity Chi indices for cycles of 6 atoms |
| Tiwie           | 9       | Information Weiner                                               |
| S(27)           | 10      | Atom-type Estate sum for :C::                                    |
| S(26)           | 11      | Atom-type Estate sum for :C:-                                    |
| Rpc             | 12      | Relative positive charge                                         |
| S(37)           | 13      | Atom-type Estate sum for -N<< ( $NO_2$ )                         |
| $Q_{N, Max}$    | 14      | Most positive charge on N atoms                                  |
| Hiwpa           | 15      | Amphiphilic Moment                                               |
| Hiwpb           | 16      | Hydrophobic Intery Moment                                        |
| S(20)           | 17      | Atom-type Estate sum for =CH-                                    |
| $Q_{H, Min}$    | 18      | Most negative charge on H atoms                                  |
| S(21)           | 19      | Atom-type Estate sum for :CH: (aromatic)                         |
| S(34)           | 20      | Atom-type Estate sum for =N-                                     |
| S(41)           | 21      | Atom-type Estate sum for -O-                                     |
| S(36)           | 22      | Atom-type Estate sum for >N-                                     |
| ${}^6\chi_{CH}$ | 23      | Simple molecular connectivity Chi indices for cycles of 6 atom   |
| Capty           | 24      | Capacity factor                                                  |
| S(16)           | 25      | Atom-type Estate sum for -CH <sub>3</sub>                        |
| $\mu$           | 26      | Molecular dipole moment                                          |
| $Q_{H, Max}$    | 27      | Most positive charge on H atoms                                  |
| S(9)            | 28      | Atom-type H Estate sum for =CH- ( $sp^2$ )                       |
| Mpc             | 29      | Mean of positive charges                                         |
| Hiwpl           | 30      | Hydrophilic Intery Moment                                        |
| nring           | 31      | Numbers of rings                                                 |
| S(18)           | 32      | Atom-type Estate sum for >CH <sub>2</sub>                        |
| Rnc             | 33      | Relative negative charge                                         |
| Mnc             | 34      | Mean of negative charges                                         |
| S(13)           | 35      | Atom-type H Estate sum for CH <sub>n</sub> (unsaturated)         |
| $Q_{C, Min}$    | 36      | Most negative charge on C atoms                                  |

|                     |    |                                                                     |
|---------------------|----|---------------------------------------------------------------------|
| S(38)               | 37 | Atom-type Estate sum for :N:-                                       |
| $^5\chi_{CH}^v$     | 38 | Valence molecular connectivity Chi indices for cycles of 5 atoms    |
| $^4\chi_{PC}^v$     | 39 | Valence molecular connectivity Chi indices for path/cluster         |
| Mac                 | 40 | Mean absolute charge                                                |
| Shpb                | 41 | Hydrophobic region                                                  |
| Tradi               | 42 | PetitJohn R2 Index                                                  |
| dis1                | 43 | Length vectors (longest distance)                                   |
| Gloty               | 44 | Molecular globularity                                               |
| S(32)               | 45 | Atom-type Estate sum for :NH:                                       |
| S(56)               | 46 | Atom-type Estate sum for -S-                                        |
| $^4\chi_{PC}$       | 47 | Simple molecular connectivity Chi indices for path/cluster          |
| S(2)                | 48 | Atom-type H Estate sum for =NH                                      |
| S(60)               | 49 | Atom-type Estate sum for -Cl                                        |
| S(40)               | 50 | Atom-type Estate sum for =O                                         |
| A <sub>Q, min</sub> | 51 | Most negative charge in a molecule                                  |
| S <sub>car</sub>    | 52 | Sum of Estate indices of carbon atoms                               |
| n <sub>nitro</sub>  | 53 | Count of N atoms                                                    |
| S(14)               | 54 | Atom-type H Estate sum for CH <sub>n</sub> (aromatic)               |
| A <sub>Q, max</sub> | 55 | Most positive charge in a molecule                                  |
| S(35)               | 56 | Atom-type Estate sum for :N:                                        |
| S <sub>anc</sub>    | 57 | Sum of solvent accessible surface areas of negatively charged atoms |
| S(42)               | 58 | Atom-type Estate sum for :O:                                        |
| S(5)                | 59 | Atom-type H Estate sum for >NH                                      |
| Q <sub>O, Max</sub> | 60 | Most positive charge on O atoms                                     |
| n <sub>sulph</sub>  | 61 | Count of S atoms                                                    |
| S(29)               | 62 | Atom-type Estate sum for -NH <sub>2</sub>                           |
| S(4)                | 63 | Atom-type H Estate sum for -NH <sub>2</sub>                         |

**Table S4.** Relatively important 37 descriptors identified by C4.5 DT for the prediction of Toplis and non-Toplis.

| Descriptor                   | Ranking | Description                                                                    |
|------------------------------|---------|--------------------------------------------------------------------------------|
| S(27)                        | 1       | Atom-type Estate sum for :C::                                                  |
| nring                        | 2       | Numbers of rings                                                               |
| S(32)                        | 2       | Atom-type Estate sum for :NH:                                                  |
| Gloty                        | 4       | Molecular globularity                                                          |
| nrot                         | 4       | Number of rotatable bonds                                                      |
| S(42)                        | 4       | Atom-type Estate sum for :O:                                                   |
| Q <sub>H, Min</sub>          | 7       | Most negative charge on H atoms                                                |
| S(5)                         | 7       | Atom-type H Estate sum for >NH                                                 |
| S(2)                         | 7       | Atom-type H Estate sum for =NH                                                 |
| Q <sub>O, Max</sub>          | 7       | Most positive charge on O atoms                                                |
| dis3                         | 11      | Length vectors (4 <sup>th</sup> atom)                                          |
| S(31)                        | 11      | Atom-type Estate sum for >NH                                                   |
| nhev                         | 11      | Count of heavy atoms                                                           |
| <sup>0</sup> χ <sup>v</sup>  | 11      | Valence molecular connectivity Chi indices for path order 0                    |
| S(20)                        | 11      | Atom-type Estate sum for =CH-                                                  |
| S(33)                        | 11      | Atom-type Estate sum for ≡N                                                    |
| nhyd                         | 11      | Count of hydrogen atoms                                                        |
| <sup>6</sup> χ <sub>CH</sub> | 11      | Valence molecular connectivity Chi indices for cycles of 6 atoms               |
| Hiwpl                        | 11      | Hydrophilic Intery Moment                                                      |
| Svpc                         | 20      | Sum of van der Waals surface areas of positively charged atoms                 |
| Q <sub>N, Min</sub>          | 20      | Most negative charge on N atoms                                                |
| nhet                         | 20      | Count of hetero atoms                                                          |
| nnitro                       | 23      | Count of N atoms                                                               |
| S(26)                        | 23      | Atom-type Estate sum for :C:-                                                  |
| Svpcw                        | 25      | Sum of charge weighted van der Waals surface areas of positively charged atoms |
| Q <sub>H, Max</sub>          | 25      | Most positive charge on H atoms                                                |
| Q <sub>C, Max</sub>          | 25      | Most positive charge on C atoms                                                |
| Hlb                          | 28      | Hydrophilic-Hydrophobic balance                                                |
| Hiwpa                        | 28      | Amphiphilic Moment                                                             |
| S(37)                        | 28      | Atom-type Estate sum for -N<< (NO <sub>2</sub> )                               |
| <sup>5</sup> χ <sub>CH</sub> | 31      | Valence molecular connectivity Chi indices for cycles of 5 atoms               |
| S(14)                        | 31      | Atom-type H Estate sum for CH <sub>n</sub> (aromatic)                          |
| S(35)                        | 31      | Atom-type Estate sum for :N:                                                   |
| S(22)                        | 31      | Atom-type Estate sum for >CH-                                                  |
| Mnc                          | 35      | Mean of negative charges                                                       |
| S(1)                         | 35      | Atom-type H Estate sum for -OH                                                 |

|      |    |                  |
|------|----|------------------|
| noxy | 35 | Count of O atoms |
|------|----|------------------|

**Table S5.** 67 molecules with RF scores greater than 0.7.

| Sequence number | Name      | RF score | Binding energy (kcal/mol) |
|-----------------|-----------|----------|---------------------------|
| 1               | MBX161745 | 0.912    | -10.1                     |
| 2               | MBX135104 | 0.901    | -8.9                      |
| 3               | MBX135061 | 0.878    | -9.4                      |
| 4               | MBX135132 | 0.878    | -8.1                      |
| 5               | MBX183355 | 0.851    | -8.3                      |
| 6               | MBX135103 | 0.845    | -8.5                      |
| 7               | MBX132963 | 0.829    | -9                        |
| 8               | MBX135059 | 0.818    | -8.7                      |
| 9               | MBX135110 | 0.818    | -8.6                      |
| 10              | MBX135138 | 0.818    | -8.7                      |
| 11              | MBX143215 | 0.818    | -8.6                      |
| 12              | MBX212936 | 0.818    | -9                        |
| 13              | MBX135102 | 0.807    | -8.4                      |
| 14              | MBX190743 | 0.807    | -8.6                      |
| 15              | MBX212932 | 0.807    | -9                        |
| 16              | MBX133000 | 0.801    | -8.9                      |
| 17              | MBX135121 | 0.796    | -9.1                      |
| 18              | MBX161743 | 0.796    | -8.8                      |
| 19              | MBX202304 | 0.796    | -9.4                      |
| 20              | MBX212316 | 0.79     | -9.8                      |
| 21              | MBX534671 | 0.79     | -8.5                      |
| 22              | MBX135063 | 0.773    | -8.7                      |
| 23              | MBX133352 | 0.762    | -9.4                      |
| 24              | MBX135131 | 0.762    | -8.1                      |
| 25              | MBX183350 | 0.762    | -8.1                      |
| 26              | MBX534737 | 0.762    | -9.5                      |
| 27              | MBX190730 | 0.757    | -9.9                      |
| 28              | MBX190744 | 0.757    | -9.6                      |
| 29              | MBX212938 | 0.757    | -8.9                      |
| 30              | MBX135100 | 0.751    | -8.5                      |
| 31              | MBX143217 | 0.751    | -8.8                      |
| 32              | MBX212320 | 0.751    | -8.2                      |
| 33              | MBX212862 | 0.751    | -8.6                      |
| 34              | MBX212933 | 0.751    | -8.7                      |
| 35              | MBX135099 | 0.746    | -9.3                      |
| 36              | MBX212934 | 0.746    | -8.8                      |
| 37              | MBX477559 | 0.746    | -8.6                      |
| 38              | MBX135133 | 0.74     | -7.9                      |
| 39              | MBX209152 | 0.74     | -10.3                     |

|    |           |       |       |
|----|-----------|-------|-------|
| 40 | MBX133023 | 0.735 | -9    |
| 41 | MBX212321 | 0.735 | -8.9  |
| 42 | MBX190731 | 0.729 | -9.9  |
| 43 | MBX212244 | 0.729 | -9.2  |
| 44 | MBX212876 | 0.729 | -8.9  |
| 45 | MBX534706 | 0.729 | -11.4 |
| 46 | MBX135092 | 0.724 | -9.6  |
| 47 | MBX161741 | 0.724 | -9.7  |
| 48 | MBX212886 | 0.724 | -8.7  |
| 49 | MBX534707 | 0.724 | -9.7  |
| 50 | MBX212243 | 0.718 | -8.1  |
| 51 | MBX212883 | 0.718 | -9.3  |
| 52 | MBX212937 | 0.718 | -8.3  |
| 53 | MBX190732 | 0.713 | -10.1 |
| 54 | MBX201924 | 0.713 | -9.1  |
| 55 | MBX204808 | 0.713 | -9.5  |
| 56 | MBX209154 | 0.713 | -8.9  |
| 57 | MBX534660 | 0.713 | -8.7  |
| 58 | MBX135057 | 0.707 | -9    |
| 59 | MBX143200 | 0.707 | -7.8  |
| 60 | MBX161748 | 0.707 | -10.2 |
| 61 | MBX162127 | 0.707 | -10.5 |
| 62 | MBX183356 | 0.707 | -8.5  |
| 63 | MBX212860 | 0.707 | -9.4  |
| 64 | MBX162142 | 0.702 | -9.6  |
| 65 | MBX182993 | 0.702 | -8.3  |
| 66 | MBX212881 | 0.702 | -9.4  |
| 67 | MBX534585 | 0.702 | -9.7  |

**Table S6.** All molecular descriptors used in this work.

| <b>simple molecular properties(18)</b>      |                  |                                                                 | <b>class</b> |
|---------------------------------------------|------------------|-----------------------------------------------------------------|--------------|
| 1                                           | W <sub>mol</sub> | Molecular weight                                                | 1            |
| 2                                           | nhyd             | Count of hydrogen atoms                                         | 8            |
| 3                                           | nhal             | Count of halogen atoms                                          | 8            |
| 4                                           | nhet             | Count of hetero atoms                                           | 8            |
| 5                                           | nhev             | Count of heavy atoms                                            | 8            |
| 6                                           | ncof             | Count of F atoms                                                | 8            |
| 7                                           | ncocl            | Count of Cl atoms                                               | 8            |
| 8                                           | ncobr            | Count of Br atoms                                               | 8            |
| 9                                           | ncoi             | Count of I atoms                                                | 8            |
| 10                                          | ncarb            | Count of C atoms                                                | 8            |
| 11                                          | nphos            | Count of P atoms                                                | 8            |
| 12                                          | nsulph           | Count of S atoms                                                | 8            |
| 13                                          | noxy             | Count of O atoms                                                | 8, 5         |
| 14                                          | nnitro           | Count of N atoms                                                | 8,5          |
| 15                                          | nring            | Numbers of rings                                                | 8, 2         |
| 16                                          | nrot             | Number of rotatable bonds                                       | 8, 2         |
| 17                                          | ndonr            | Number of H-bond donors                                         | 4            |
| 18                                          | naccr            | Number of H-bond acceptors                                      | 5            |
| <b>molecular connectivity and shape(27)</b> |                  |                                                                 |              |
| 19                                          | ${}^0\chi$       | Simple molecular connectivity Chi indices for path order 0      | 2            |
| 20                                          | ${}^1\chi$       | Simple molecular connectivity Chi indices for path order 1      | 2            |
| 21                                          | ${}^2\chi$       | Simple molecular connectivity Chi indices for path order 2      | 2            |
| 22                                          | ${}^3\chi_P$     | Simple molecular connectivity Chi indices for path order 3      | 2            |
| 23                                          | ${}^3\chi_C$     | Simple molecular connectivity Chi indices for cluster           | 2            |
| 24                                          | ${}^4\chi_{PC}$  | Simple molecular connectivity Chi indices for path/cluster      | 2            |
| 25                                          | ${}^3\chi_{CH}$  | Simple molecular connectivity Chi indices for cycles of 3 atoms | 2            |
| 26                                          | ${}^4\chi_{CH}$  | Simple molecular connectivity Chi indices for cycles of 4 atom  | 2            |

|                                     |                                   |                                                                  |      |
|-------------------------------------|-----------------------------------|------------------------------------------------------------------|------|
| 27                                  | ${}^5\chi_{\text{CH}}$            | Simple molecular connectivity Chi indices for cycles of 5 atom   | 2    |
| 28                                  | ${}^6\chi_{\text{CH}}$            | Simple molecular connectivity Chi indices for cycles of 6 atom   | 2    |
| 29                                  | ${}^0\chi^{\text{v}}$             | Valence molecular connectivity Chi indices for path order 0      | 2    |
| 30                                  | ${}^1\chi^{\text{v}}$             | Valence molecular connectivity Chi indices for path order 1      | 2    |
| 31                                  | ${}^2\chi^{\text{v}}$             | Valence molecular connectivity Chi indices for path order 2      | 2    |
| 32                                  | ${}^3\chi^{\text{v}}_{\text{P}}$  | Valence molecular connectivity Chi indices for path order 3      | 2    |
| 33                                  | ${}^3\chi^{\text{v}}_{\text{C}}$  | Valence molecular connectivity Chi indices for cluster           | 2    |
| 34                                  | ${}^4\chi^{\text{v}}_{\text{PC}}$ | Valence molecular connectivity Chi indices for path/cluster      | 2    |
| 35                                  | ${}^3\chi^{\text{v}}_{\text{CH}}$ | valence molecular connectivity Chi indices for cycles of 3 atoms | 2    |
| 36                                  | ${}^4\chi^{\text{v}}_{\text{CH}}$ | valence molecular connectivity Chi indices for cycles of 4 atoms | 2    |
| 37                                  | ${}^5\chi^{\text{v}}_{\text{CH}}$ | valence molecular connectivity Chi indices for cycles of 5 atoms | 2    |
| 38                                  | ${}^6\chi^{\text{v}}_{\text{CH}}$ | valence molecular connectivity Chi indices for cycles of 6 atoms | 2    |
| 39                                  | ${}^1\kappa$                      | Molecular shape Kappa indices for one boned fragments            | 2    |
| 40                                  | ${}^2\kappa$                      | Molecular shape Kappa indices for two boned fragments            | 2    |
| 41                                  | ${}^3\kappa$                      | Molecular shape Kappa indices for three boned fragments          | 2    |
| 42                                  | ${}^1\kappa_{\alpha}$             | Kappa alpha indices for one boned fragments                      | 2    |
| 43                                  | ${}^2\kappa_{\alpha}$             | Kappa alpha indices for two boned fragments                      | 2    |
| 44                                  | ${}^3\kappa_{\alpha}$             | Kappa alpha indices for three boned fragments                    | 2    |
| 45                                  | phi                               | Kier molecular flexibility index                                 | 2    |
| <b>electrotopological state(97)</b> |                                   |                                                                  |      |
| 46                                  | $S_{\text{hev}}$                  | Sum of electrotopological state (Estate) indices of heavy atoms  | 3    |
| 47                                  | $S_{\text{car}}$                  | Sum of Estate indices of carbon atoms                            | 3    |
| 48                                  | $S_{\text{het}}$                  | Sum of Estate indices of hetero atoms                            | 3    |
| 49                                  | $S_{\text{hal}}$                  | Sum of Estate indices of halogen atoms                           | 3    |
| 50                                  | S(1)                              | Atom-type H Estate sum for -OH                                   | 3, 4 |
| 51                                  | S(2)                              | Atom-type H Estate sum for =NH                                   | 3,4  |
| 52                                  | S(3)                              | Atom-type H Estate sum for -SH                                   | 3,4  |
| 53                                  | S(4)                              | Atom-type H Estate sum for -NH <sub>2</sub>                      | 3,4  |



|    |       |                                                                                  |     |
|----|-------|----------------------------------------------------------------------------------|-----|
| 54 | S(5)  | Atom-type H Estate sum for > NH                                                  | 3,4 |
| 55 | S(6)  | Atom-type H Estate sum for : NH:                                                 | 3   |
| 56 | S(7)  | Atom-type H Estate sum for #CH (sp)                                              | 3   |
| 57 | S(8)  | Atom-type H Estate sum for =CH <sub>2</sub> (sp <sup>2</sup> )                   | 3   |
| 58 | S(9)  | Atom-type H Estate sum for =CH- (sp <sup>2</sup> )                               | 3   |
| 59 | S(10) | Atom-type H Estate sum for :CH: (sp <sup>2</sup> , aromatic)                     | 3   |
| 60 | S(11) | Atom-type H Estate sum for CH <sub>n</sub> X (sp <sup>3</sup> , X= F, Cl, Br, I) | 3   |
| 61 | S(12) | Atom-type H Estate sum for CH <sub>n</sub> (Saturated)                           | 3   |
| 62 | S(13) | Atom-type H Estate sum for CH <sub>n</sub> (unsaturated)                         | 3   |
| 63 | S(14) | Atom-type H Estate sum for CH <sub>n</sub> (aromatic)                            | 3   |
| 64 | S(15) | Atom-type H Estate sum for AH <sub>n</sub> (not C, N, O, S)                      | 3   |
| 65 | S(16) | Atom-type Estate sum for -CH <sub>3</sub>                                        | 3   |
| 66 | S(17) | Atom-type Estate sum for =CH <sub>2</sub>                                        | 3   |
| 67 | S(18) | Atom-type Estate sum for >CH <sub>2</sub>                                        | 3   |
| 68 | S(19) | Atom-type Estate sum for ≡CH                                                     | 3   |
| 69 | S(20) | Atom-type Estate sum for =CH-                                                    | 3   |
| 70 | S(21) | Atom-type Estate sum for : CH : (aromatic)                                       | 3   |
| 71 | S(22) | Atom-type Estate sum for >CH-                                                    | 3   |
| 72 | S(23) | Atom-type Estate sum for =C=                                                     | 3   |
| 73 | S(24) | Atom-type Estate sum for ≡C-                                                     | 3   |
| 74 | S(25) | Atom-type Estate sum for =C<                                                     | 3   |
| 75 | S(26) | Atom-type Estate sum for : C:-                                                   | 3   |
| 76 | S(27) | Atom-type Estate sum for : C ::                                                  | 3   |
| 77 | S(28) | Atom-type Estate sum for >C<                                                     | 3   |
| 78 | S(29) | Atom-type Estate sum for -NH <sub>2</sub>                                        | 3   |
| 79 | S(30) | Atom-type Estate sum for =NH                                                     | 3   |
| 80 | S(31) | Atom-type Estate sum for >NH                                                     | 3   |
| 81 | S(32) | Atom-type Estate sum for :NH:                                                    | 3,5 |
| 82 | S(33) | Atom-type Estate sum for ≡N                                                      | 3   |

|     |       |                                                    |     |
|-----|-------|----------------------------------------------------|-----|
| 83  | S(34) | Atom-type Estate sum for =N-                       | 3   |
| 84  | S(35) | Atom-type Estate sum for :N:                       | 3,5 |
| 85  | S(36) | Atom-type Estate sum for >N-                       | 3   |
| 86  | S(37) | Atom-type Estate sum for -N<< (NO <sub>2</sub> )   | 3   |
| 87  | S(38) | Atom-type Estate sum for :N:-                      | 3,5 |
| 88  | S(39) | Atom-type Estate sum for -OH                       | 3,5 |
| 89  | S(40) | Atom-type Estate sum for =O                        | 3,5 |
| 90  | S(41) | Atom-type Estate sum for -O-                       | 3,5 |
| 91  | S(42) | Atom-type Estate sum for :O:                       | 3,5 |
| 92  | S(43) | Atom-type Estate sum for -F                        | 3   |
| 93  | S(44) | Atom-type Estate sum for -SiH <sub>3</sub>         | 3   |
| 94  | S(45) | Atom-type Estate sum for -SiH <sub>2</sub> -       | 3   |
| 95  | S(46) | Atom-type Estate sum for >SiH-                     | 3   |
| 96  | S(47) | Atom-type Estate sum for >Si<                      | 3   |
| 97  | S(48) | Atom-type Estate sum for -PH <sub>2</sub>          | 3   |
| 98  | S(49) | Atom-type Estate sum for -PH-                      | 3   |
| 99  | S(50) | Atom-type Estate sum for >P-                       | 3   |
| 100 | S(51) | Atom-type Estate sum for ->P= (P.O)                | 3   |
| 101 | S(52) | Atom-type Estate sum for ==P= (P. O <sub>2</sub> ) | 3   |
| 102 | S(53) | Atom-type Estate sum for -                         | 3   |
| 103 | S(54) | Atom-type Estate sum for -SH                       | 3   |
| 104 | S(55) | Atom-type Estate sum for =S                        | 3,5 |
| 105 | S(56) | Atom-type Estate sum for -S-                       | 3   |
| 106 | S(57) | Atom-type Estate sum for :S:                       | 3,5 |
| 107 | S(58) | Atom-type Estate sum for >S=O                      | 3   |
| 108 | S(59) | Atom-type Estate sum for >S<<                      | 3   |
| 109 | S(60) | Atom-type Estate sum for -Cl                       | 3   |
| 110 | S(61) | Atom-type Estate sum for GeH <sub>3</sub>          | 3   |
| 111 | S(62) | Atom-type Estate sum for -GeH <sub>2</sub> -       | 3   |

|     |       |                                              |   |
|-----|-------|----------------------------------------------|---|
| 112 | S(63) | Atom-type Estate sum for >GeH-               | 3 |
| 113 | S(64) | Atom-type Estate sum for >Ge<                | 3 |
| 114 | S(65) | Atom-type Estate sum for -AsH <sub>2</sub>   | 3 |
| 115 | S(66) | Atom-type Estate sum for -AsH-               | 3 |
| 116 | S(67) | Atom-type Estate sum for >As-                | 3 |
| 117 | S(68) | Atom-type Estate sum for ->As=               | 3 |
| 118 | S(69) | Atom-type Estate sum for -SeH                | 3 |
| 119 | S(70) | Atom-type Estate sum for =Se                 | 3 |
| 120 | S(71) | Atom-type Estate sum for -Se-                | 3 |
| 121 | S(72) | Atom-type Estate sum for :Se:                | 3 |
| 122 | S(73) | Atom-type Estate sum for >Se=                | 3 |
| 123 | S(74) | Atom-type Estate sum for -=Se=-              | 3 |
| 124 | S(75) | Atom-type Estate sum for -Br                 | 3 |
| 125 | S(76) | Atom-type Estate sum for -SnH <sub>3</sub>   | 3 |
| 126 | S(77) | Atom-type Estate sum for -SnH <sub>2</sub> - | 3 |
| 127 | S(78) | Atom-type Estate sum for >SnH-               | 3 |
| 128 | S(79) | Atom-type Estate sum for >Sn<                | 3 |
| 129 | S(80) | Atom-type Estate sum for -I                  | 3 |
| 130 | Twien | Weiner Index                                 | 2 |
| 131 | Tcent | Centric Index                                | 2 |
| 132 | Talte | Altenburg Index                              | 2 |
| 133 | Tbala | Balaban Index                                | 2 |
| 134 | Thara | Harary Number                                | 2 |
| 135 | Tschl | Schultz Index                                | 2 |
| 136 | Tradi | PetitJohn R2 Index                           | 2 |
| 137 | Tdiam | PetitJohn D2 Index                           | 2 |
| 138 | Tbmdd | Mean Distance Index                          | 2 |
| 139 | Tpeti | PetitJohn I2 Index                           | 2 |
| 140 | Tiwie | Information Weiner                           | 2 |

|                                         |              |                                        |      |
|-----------------------------------------|--------------|----------------------------------------|------|
| 141                                     | Trmsd        | Balaban RMSD Index                     | 2    |
| 142                                     | Tigdi        | Graph Distance Index                   | 2    |
| <b>quantum chemical properties (22)</b> |              |                                        |      |
| 143                                     | $\pi_i$      | Polarizability index                   | 6,7  |
| 144                                     | $\mu$        | Molecular dipole moment                | 6    |
| 145                                     | $Q_{H, Max}$ | Most positive charge on H atoms        | 3,4  |
| 146                                     | $Q_{C, Max}$ | Most positive charge on C atoms        | 3,4  |
| 147                                     | $Q_{N, Max}$ | Most positive charge on N atoms        | 3,4  |
| 148                                     | $Q_{O, Max}$ | Most positive charge on O atoms        | 3,4  |
| 149                                     | $Q_{H, Min}$ | Most negative charge on H atoms        | 3, 5 |
| 150                                     | $Q_{C, Min}$ | Most negative charge on C atoms        | 3, 5 |
| 151                                     | $Q_{N, Min}$ | Most negative charge on N atoms        | 3, 5 |
| 152                                     | $Q_{O, Min}$ | Most negative charge on O atoms        | 3, 5 |
| 153                                     | $A_{Q, max}$ | Most positive charge in a molecule     | 3    |
| 154                                     | $A_{Q, min}$ | Most negative charge in a molecule     | 3    |
| 155                                     | $Q_{H, SS}$  | Sum of squares of charges on H atoms   | 3    |
| 156                                     | $Q_{C, SS}$  | Sum of squares of charges on C atoms   | 3    |
| 157                                     | $Q_{N, SS}$  | Sum of squares of charges on N atoms   | 3    |
| 158                                     | $Q_{O, SS}$  | Sum of squares of charges on O atoms   | 3    |
| 159                                     | $Q_{A, SS}$  | Sum of squares of charges on all atoms | 3    |
| 160                                     | Mpc          | Mean of positive charges               | 3    |
| 161                                     | Mnc          | Mean of negative charges               | 3    |
| 162                                     | Mac          | Mean absolute charge                   | 3    |
| 163                                     | Rpc          | Relative positive charge               | 3    |
| 164                                     | Rnc          | Relative negative charge               | 3    |
| <b>geometrical properties(25)</b>       |              |                                        |      |
| 165                                     | dis1         | Length vectors (longest distance)      | 1    |
| 166                                     | dis2         | Length vectors (longest third atom)    | 1    |
| 167                                     | dis3         | Length vectors (4 <sup>th</sup> atom)  | 1    |

|     |                 |                                                                                     |     |
|-----|-----------------|-------------------------------------------------------------------------------------|-----|
| 168 | V <sub>mc</sub> | Van der Waals molecular volume                                                      | 1   |
| 169 | AS              | Solvent accessible surface area                                                     | 1   |
| 170 | VS              | van der Waals surface area                                                          | 1   |
| 171 | MS              | Molecular surface area                                                              | 1   |
| 172 | PSA             | Polar molecular surface area                                                        | 6   |
| 173 | Sapc            | Sum of solvent accessible surface areas of positively charged atoms                 | 4   |
| 174 | Sanc            | Sum of solvent accessible surface areas of negatively charged atoms                 | 5   |
| 175 | Sapcw           | Sum of charge weighted solvent accessible surface areas of positively charged atoms | 4   |
| 176 | Sancw           | Sum of charge weighted solvent accessible surface areas of negatively charged atoms | 5   |
| 177 | Svpc            | Sum of van der Waals surface areas of positively charged atoms                      | 4   |
| 178 | Svnc            | Sum of van der Waals surface areas of negatively charged atoms                      | 5   |
| 179 | Svpcw           | Sum of charge weighted van der Waals surface areas of positively charged atoms      | 4   |
| 180 | Svncw           | Sum of charge weighted van der Waals surface areas of negatively charged atoms      | 5   |
| 181 | Rugty           | Molecular rugosity                                                                  | 6,7 |
| 182 | Gloty           | Molecular globularity                                                               | 6,7 |
| 183 | Shpl            | Hydrophilic region                                                                  | 6   |
| 184 | Shpb            | Hydrophobic region                                                                  | 7   |
| 185 | Capy            | Capacity factor                                                                     | 6,7 |
| 186 | Hlb             | Hydrophilic-Hydrophobic balance                                                     | 6,7 |
| 187 | Hiwpl           | Hydrophilic Intery Moment                                                           | 6   |
| 188 | Hiwpb           | Hydrophobic Intery Moment                                                           | 7   |
| 189 | Hiwpa           | Amphiphilic Moment                                                                  | 6,7 |

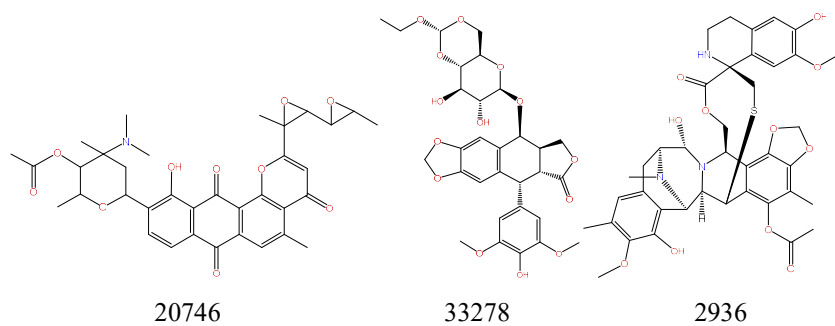

**Figure S1.** The three actual non-Top1 is mispredicted as Top1 is.

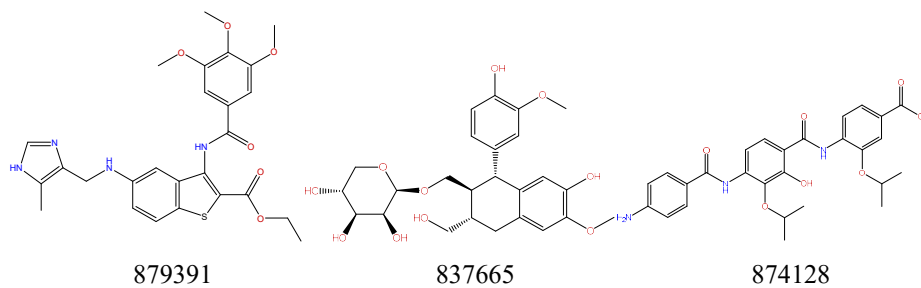

**Figure S2.** The three actual Top1 is mispredicted as non-Top1 is (three out of eleven).

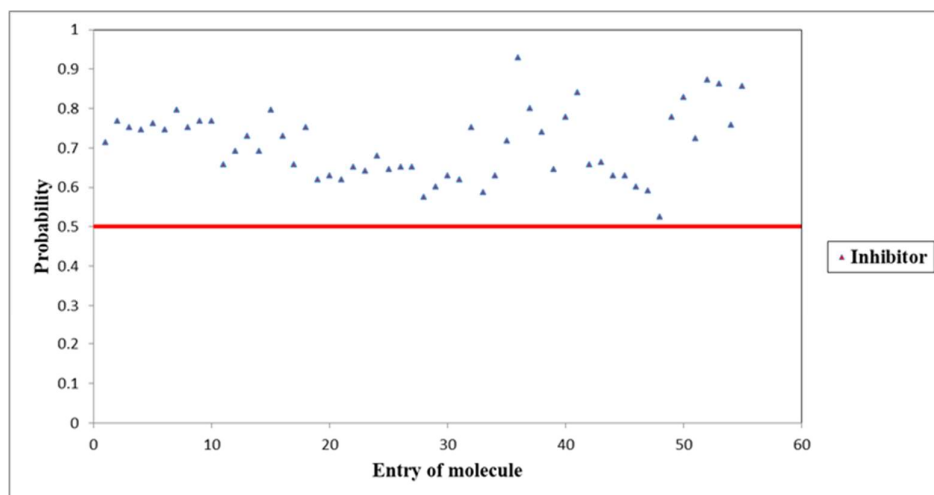

(A)

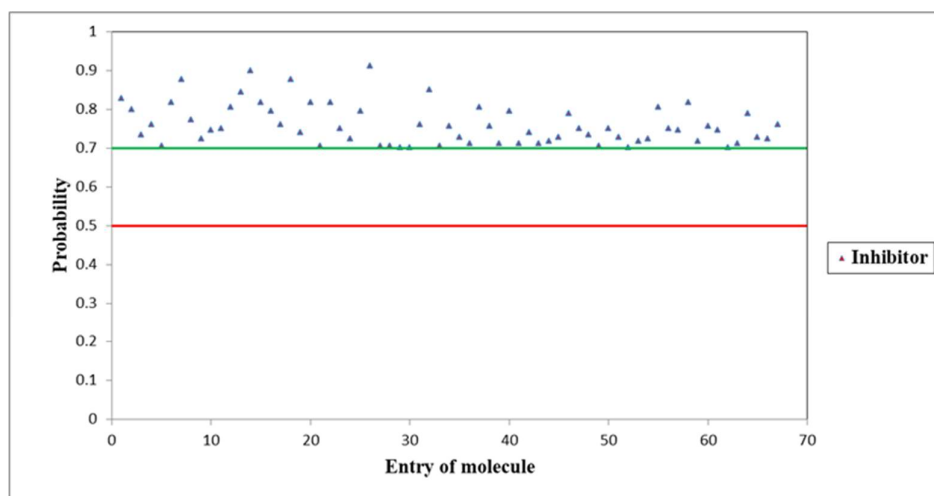

(B)

**Figure S3.** The visualized distributions of compounds. (A) in the external validation set (55 compounds), (B) in the date set of molecules singled out by virtual screening with RF scores greater than 0.7 (67 compounds).

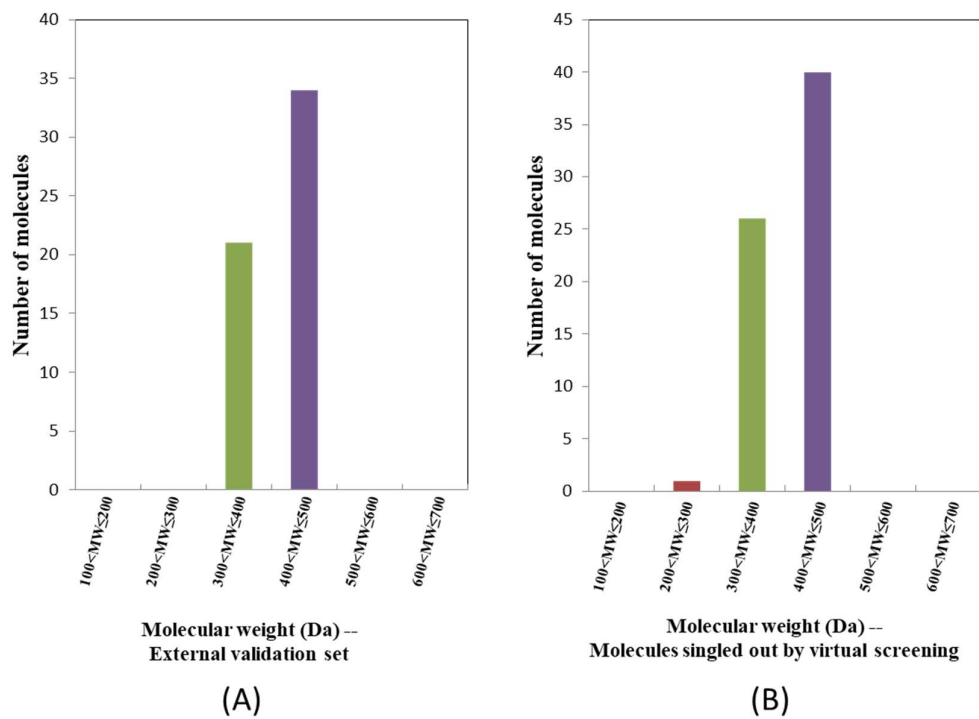

**Figure S4.** The molecular weight distributions of compounds. (A) in the external validation set (55 compounds), (B) in the date set of molecules singled out by virtual screening with RF scores greater than 0.7 (67 compounds).
